# Supplementary material
Source: Springer Nature journal article supplement (https://www.springermedizin.de/resource/supplementary/12907_2012_118_MOESM6_ESM.pdf/9524704)

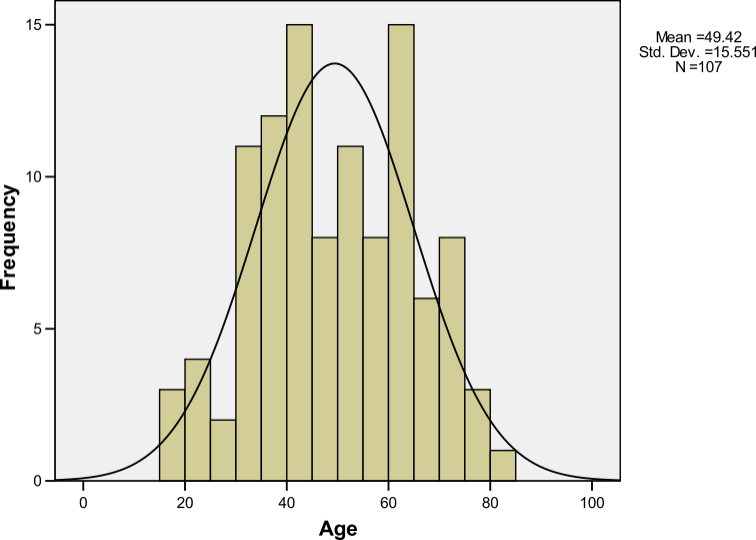

Supplement: MOESM6 [file 9524704]
